# Supplementary material for: Bcl-2 inhibition sensitizes triple-negative human breast cancer cells to doxorubicin
Source: PubMed Central journal article supplement (PMC5986635; doi:10.18632/oncotarget.25370), 2018-05-22
Supplement: oncotarget-09-25545-s001.pdf [file oncotarget-09-25545-s001.pdf]

## Bcl-2 inhibition sensitizes triple-negative human breast cancer cells to doxorubicin

### SUPPLEMENTARY MATERIALS

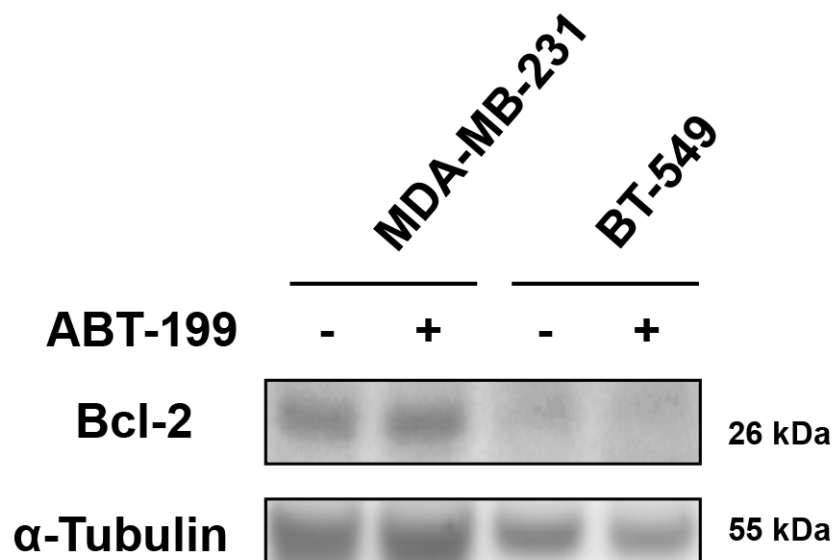

**Supplementary Figure 1: No effect of ABT-199 on the protein expression of Bcl-2 in breast cancer cell lines.** MDA-MB-231 and BT-459 cells were cultured with ABT-199 at the doses of 10  $\mu$ M and 15  $\mu$ M, respectively. After 48 h, the cells were harvested and examined for the protein expression of Bcl-2.  $\alpha$ -Tubulin was used as a control.
